# Supplementary material for: Responses of germination strategy of Agriophyllum squarrosum to rainfall pattern in the Tengger desert
Source: PeerJ. 2022 Nov 15;10:e14395. doi: 10.7717/peerj.14395 (PMC9673764; doi:10.7717/peerj.14395)
Supplement: Supplemental Information 1 [file peerj-10-14395-s001.xlsx]

## Sheet: Figure 1
figure 1A						Figure 1B
days	number	Total	rate			depth (cm)	number	Total	rate
0	0	50	0			0	3	50	0.06
0	0	50	0			0	3	50	0.06
0	0	50	0			0	4	50	0.08
1	3	50	0.06			2	48	50	0.96
1	3	50	0.06			2	49	50	0.98
1	2	50	0.04			2	48	50	0.96
2	2	50	0.04			4	36	50	0.72
2	2	50	0.04			4	30	50	0.6
2	3	50	0.06			4	40	50	0.8
3	5	50	0.1			6	21	50	0.42
3	4	50	0.08			6	25	50	0.5
3	4	50	0.08			6	18	50	0.36
4	6	50	0.12			8	12	50	0.24
4	4	50	0.08			8	15	50	0.3
4	5	50	0.1			8	9	50	0.18
5	4	50	0.08			10	0	50	0
5	7	50	0.14			10	1	50	0.02
5	7	50	0.14			10	0	50	0
6	7	50	0.14
6	6	50	0.12
6	4	50	0.08
7	16	50	0.32
7	12	50	0.24
7	20	50	0.4
8	6	50	0.12
8	4	50	0.08
8	3	50	0.06
9	1	50	0.02
9	1	50	0.02
9	3	50	0.06
10	2	50	0.04
10	1	50	0.02
10	1	50	0.02
11	1	50	0.02
11	1	50	0.02
11	0	50	0
12	0	50	0
12	0	50	0
12	0	50	0
13	0	50	0
13	0	50	0
13	0	50	0
14	0	50	0
14	0	50	0
14	0	50	0

## Sheet: Figure 2
Depth (cm)	seeds number/20cm*20cm	density (seeds/m2)
0-20	1	25
0-20	1	25
0-20	2	50
0-20	1	25
20-40	3	75
20-40	3	75
20-40	5	125
20-40	4	100
40-60	3	75
40-60	3	75
40-60	4	100
40-60	4	100
60-80	1	25
60-80	2	50
60-80	2	50
60-80	3	75
80-100	1	25
80-100	0	0
80-100	2	50
80-100	1	25

## Sheet: Figure 3
Date	precipitation(mm)		Date	precipitation(mm)	Date	precipitation(mm)					population dynamic
21.02.2017	0.4		21.02.2018	0.4	31.01.2019	0.4				2017	date	number	SD
19.03.2017	0.8		20.03.2018	4.8	19.03.2019	0.8					10/6	120	12
23.03.2017	9.6		12.04.2018	4.4	08.04.2019	2					20/6	70	11
03.04.2017	0.4		23.04.2018	2.2	12.04.2019	1					30/6	360	23
07.04.2017	6		24.04.2018	4.2	24.04.2019	0.8					10/7	230	25
08.04.2017	0.2		18.05.2018	11.4	26.04.2019	3					20/7	110	16
10.04.2017	0.2		18.05.2018	1.8	27.04.2019	1.4					30/7	560	17
10.04.2017	0.2		19.05.2018	1.8	05.05.2019	0.8					9/8	560	26
19.04.2017	5		20.05.2018	0.6	06.05.2019	10.6					19/8	540	23
02.05.2017	1.4		21.05.2018	0.4	07.05.2019	4.4					29/8	540	35
14.05.2017	1		20.06.2018	2.2	18.05.2019	0.8					8/9	780	27
14.05.2017	3.2		21.06.2018	1.8	14.06.2019	7.4					18/9	560	42
22.05.2017	1.6		01.07.2018	13	19.06.2019	0.8				2018	Date	number	SD
04.06.2017	9.2		02.07.2018	3.4	20.06.2019	1.4					21/5	108	12
06.06.2017	1.6		03.07.2018	0.4	21.06.2019	6.2					31/5	37	7
06.06.2017	0.8		19.07.2018	1.8	23.06.2019	1.4					10/6	0	0
20.06.2017	14.6		20.07.2018	12.2	26.06.2019	29.6					20/6	0	0
03.07.2017	0.4		21.07.2018	0.4	27.06.2019	7.6					30/6	0	0
03.07.2017	1.2		22.07.2018	2.4	28.06.2019	1.6					10/7	158	14
04.07.2017	0.2		23.07.2018	3.8	07.07.2019	0.4					20/7	136	12
05.07.2017	0.2		24.07.2018	3.2	08.07.2019	2					30/7	309	34
22.07.2017	0.2		25.07.2018	0.6	09.07.2019	0.4					9/8	517	46
26.07.2017	24.8		02.08.2018	1.6	26.07.2019	1					19/8	548	47
28.07.2017	0.4		03.08.2018	5.6	28.07.2019	1.2					29/8	704	37
01.08.2017	1.8		05.08.2018	1.4	29.07.2019	1					8/9	760	27
03.08.2017	5.8		06.08.2018	6.2	02.08.2019	0.8					18/9	740	37
05.08.2017	2.6		07.08.2018	9.2	19.08.2019	2				2019	Date	number	SD
07.08.2017	2		08.08.2018	3.4	20.08.2019	2.8					11/5	186	14
12.08.2017	0.2		09.08.2018	0.6	23.08.2019	6.2					21/5	73	4
19.08.2017	8.2		11.08.2018	3.8	26.08.2019	2					31/5	0	0
22.08.2017	1.2		12.08.2018	2.4	09.09.2019	3.8					10/6	0	0
23.08.2017	0.4		13.08.2018	3	10.09.2019	0.6					20/6	89	7
24.08.2017	0.4		14.08.2018	6.4	12.09.2019	7					30/6	694	25
24.08.2017	0.2		15.08.2018	1	17.09.2019	0.6					10/7	643	23
24.08.2017	0.2		21.08.2018	14.4	18.09.2019	2.6					20/7	587	19
25.08.2017	2.8		22.08.2018	4.6	19.09.2019	1.4					30/7	380	26
26.08.2017	0.2		23.08.2018	2.6	03.10.2019	1.2					9/8	138	12
26.08.2017	0.2		24.08.2018	1.8	04.10.2019	4.6					19/8	126	11
26.08.2017	0.4		25.08.2018	1	05.10.2019	5.8					29/8	257	23
27.08.2017	0.2		27.08.2018	1	06.10.2019	5					8/9	216	17
27.08.2017	19.2		29.08.2018	2.4	09.10.2019	2					18/9	206	14
01.09.2017	1.4		31.08.2018	5.8	15.10.2019	13.4
02.09.2017	0.2		01.09.2018	6.6
26.09.2017	7.6		10.09.2018	0.4
02.10.2017	2.8		14.09.2018	0.4
06.10.2017	0.2		15.09.2018	2.6
08.10.2017	3.2		17.09.2018	1
			18.09.2018	4
			19.09.2018	0.8
			26.09.2018	3.6
			27.09.2018	2.8
			19.10.2018	3
